# Supplementary material
Source: MDPI journal article supplement (https://www.mdpi.com/2073-4441/10/10/1316)
Supplement: s1 [file s1]

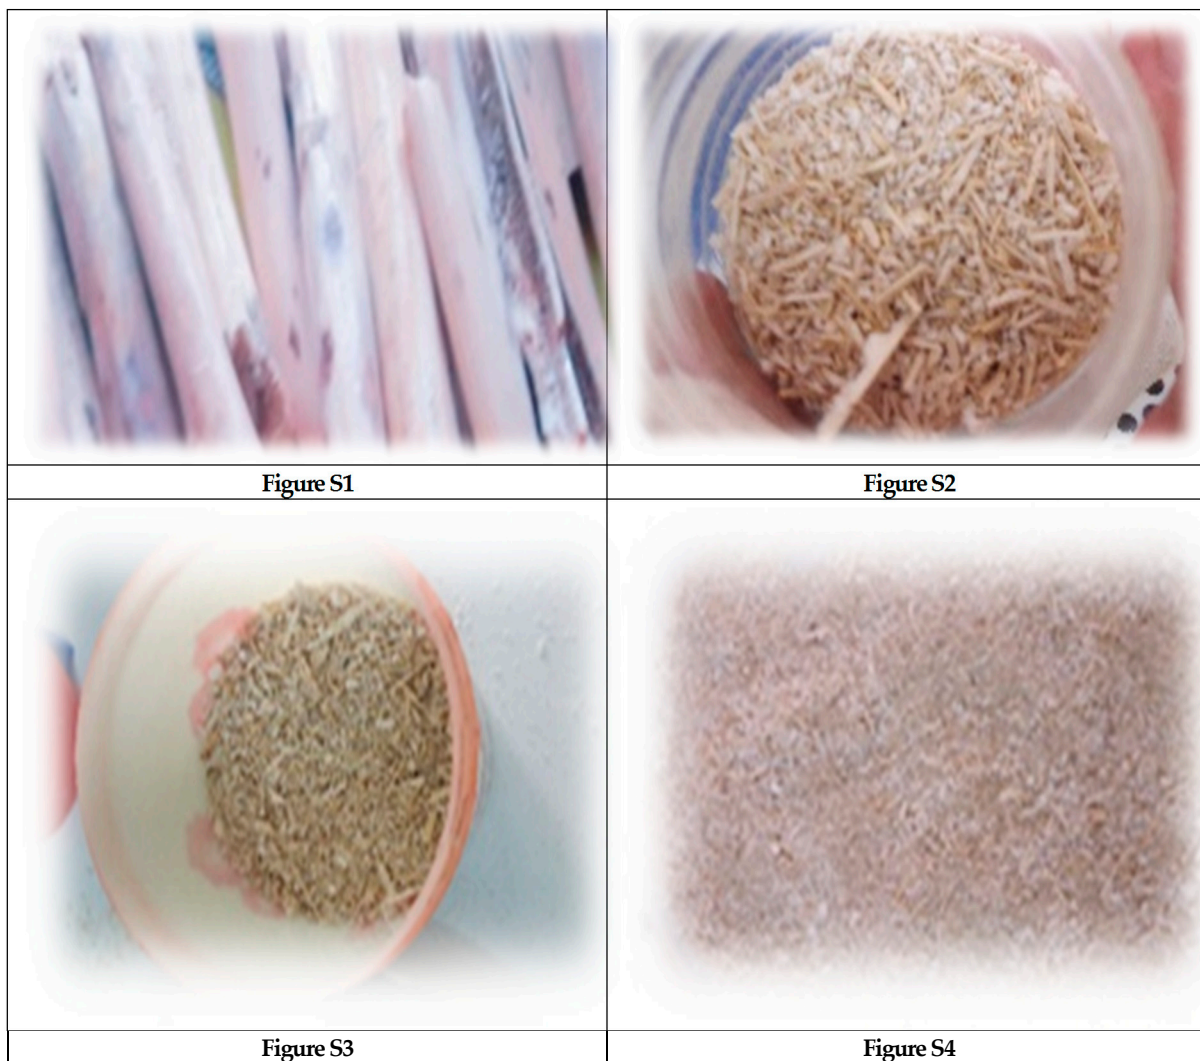

Figure S1-S4. Showing different stages in the preparation of Brassica stem adsorbent.

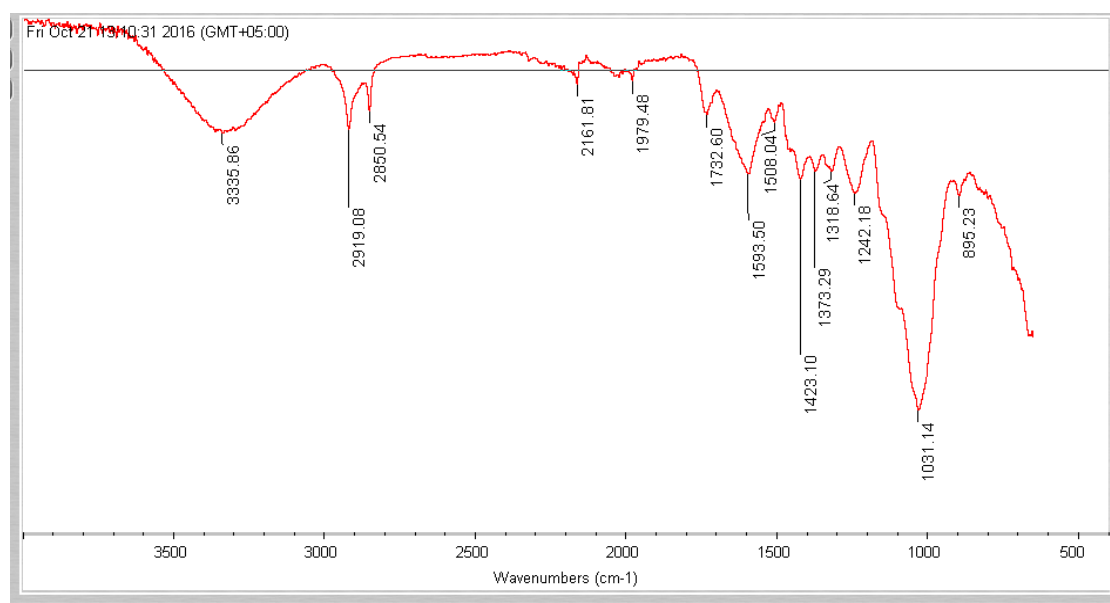

Figure S5. FTIR Spectrum of *Brassica Compestris* stem (BCS) (blank).

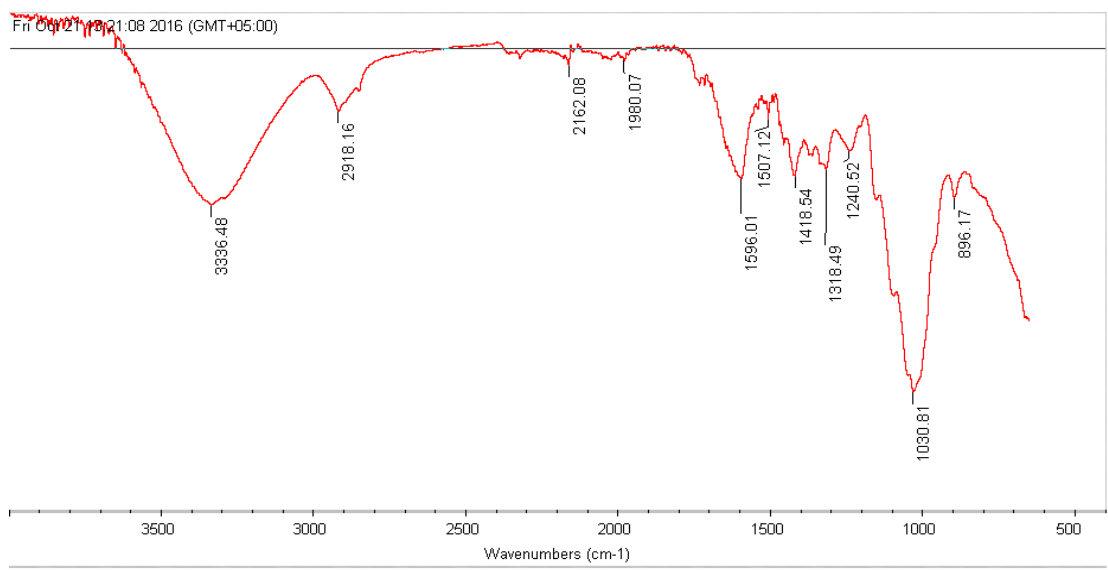

**Figure S6.** Spectrum of FT-IR & Ni-adsorbent.

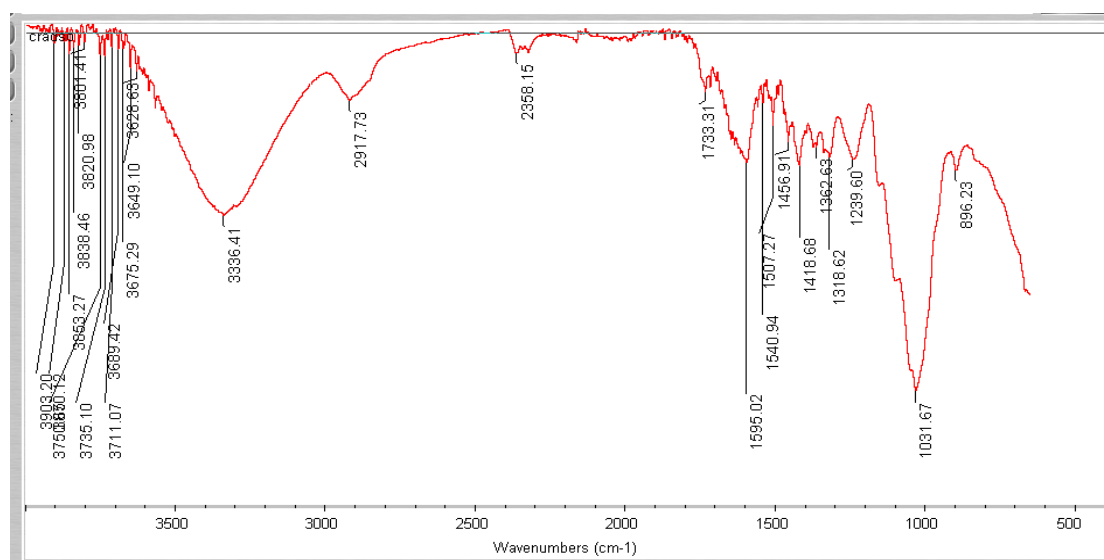

**Figure S7.** FT-IR Spectrum of Cr-adsorbent.

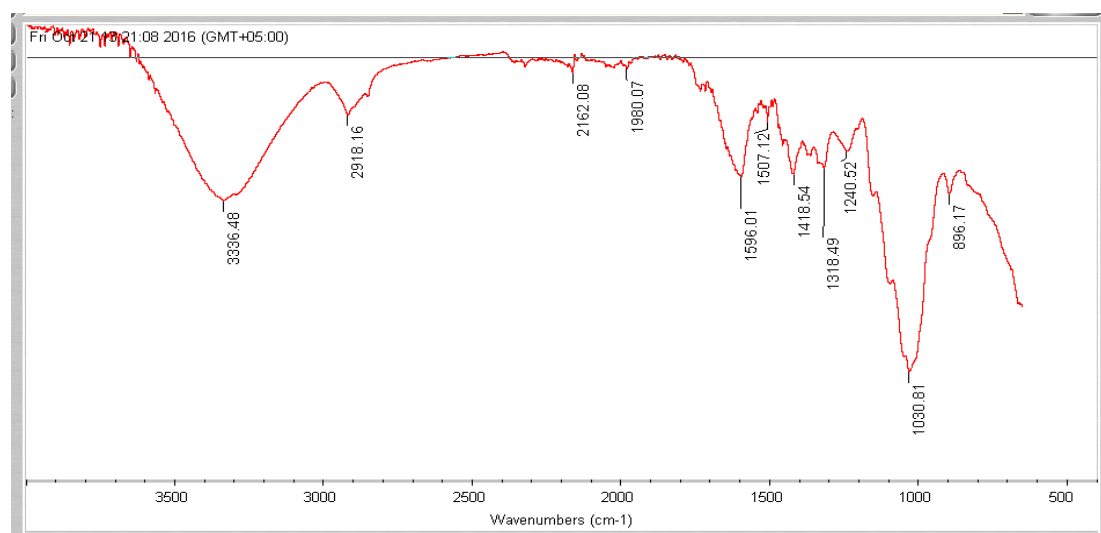

**Figure S8.** FT-IR Spectrum of Pb-adsorbent.
